# Supplementary material for: Development of mesothelin-specific CAR NK-92 cells for the treatment of gastric cancer
Source: Int J Biol Sci. 2021 Sep 3;17(14):3850–61. doi: 10.7150/ijbs.64630 (PMC8495380; doi:10.7150/ijbs.64630)
Supplement: Supplementary file 1 — Supplementary figures and table. [file ijbsv17p3850s1.pdf]

**Supplementary file for**

**Development of mesothelin-specific CAR NK-92 cells for the treatment of gastric cancer**

**Table S1. Histologic diagnoses and clinical characteristics of patients.**

|                       | Years<br>mean±SD | CEA (μg/L)<br>mean±SD | CA72-4(U/mL)<br>mean±SD | Sample<br>number |
|-----------------------|------------------|-----------------------|-------------------------|------------------|
| Normal                | 55 ± 20.6        | 2.9 ± 0.93            | 4.2 ± 1.4               | 20               |
| Gastric Cancer        | 56 ± 15.9        | 47 ± 72.8             | 34 ± 58.6               | 75               |
| Histotype             |                  |                       |                         |                  |
| Tubular               |                  |                       |                         | 15               |
| Papillary             |                  |                       |                         | 7                |
| Poorly differentiated |                  |                       |                         | 30               |
| Mucinous              |                  |                       |                         | 14               |
| Signet ring carcinoma |                  |                       |                         | 9                |

SD: standard deviation.

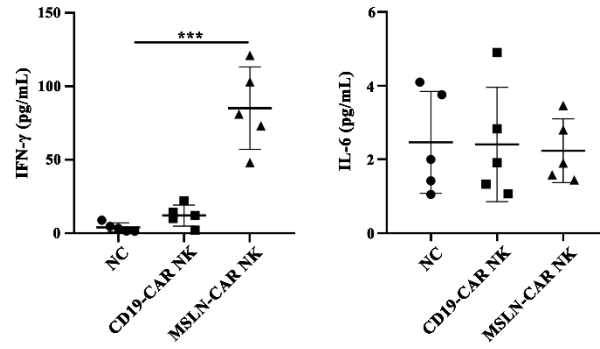

**Figure S1.** Cytokine levels in plasma of individual mice obtained from blood at 2 weeks after CAR NK cells injection in subcutaneous tumor model. Data reflected the mean  $\pm$  SEM of three independent experiments. \* $p < 0.05$ , \*\* $p < 0.01$ , and \*\*\* $p < 0.001$ .

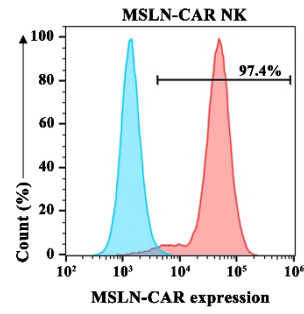

**Figure S2.** CAR expression by MSLN-CAR NK-92 cells was determined by flow cytometry with PE-Labeled Human Mesothelin Protein (ACROBiosystems, red area). Parental NK-92 cells served as control (blue area).

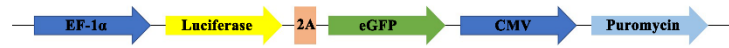

**Figure S3.** Diagram of LV5-LUC-GFP-Puro (GL) plasmid.

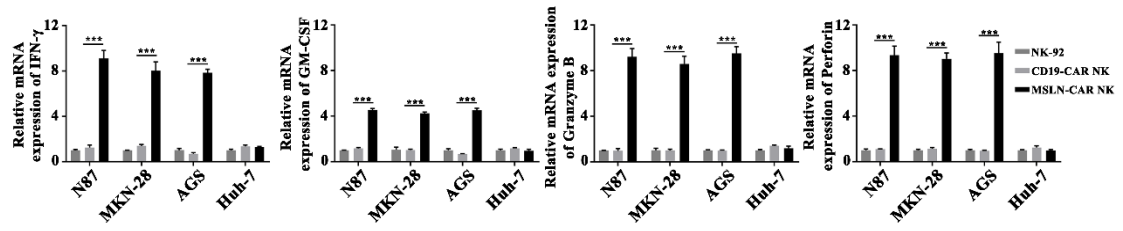

**Figure S4.** Relative mRNAs expressions of IFN- $\gamma$ , GM-CSF, Granzyme B and perforin normalized to GAPDH in CAR NK cells were detected by qPCR.
